# Supplementary material for: Assessment of the Antioxidant and Antimicrobial Potential of Ptychotis verticillata Duby Essential Oil from Eastern Morocco: An In Vitro and In Silico Analysis
Source: MDPI journal article supplement (doi:10.3390/antibiotics12040655), 2023-03-27
Supplement: s1 [file s1]

# Assessment of the Antioxidant and Antimicrobial Potential of *Ptychotis verticillata* Duby Essential Oil from Eastern Morocco: An In Vitro and In Silico Analysis

Mohamed Taibi <sup>1,2</sup>, Amine Elbouzidi <sup>1</sup>, Douaae Ou-Yahia <sup>2</sup>, Mohammed Dalli <sup>3,4</sup>, Reda Bellaouchi <sup>3</sup>, Aziz Tikent <sup>1</sup>, Mohammed Roubi <sup>3</sup>, Nadia Gseyra <sup>3</sup>, Abdeslam Asehraou <sup>3</sup>, Christophe Hano <sup>5,\*</sup>, Mohamed Addi <sup>1,\*</sup>, Bouchra El Guerrouj <sup>1,2</sup> and Khalid Chaabane <sup>1</sup>

<sup>1</sup> Laboratoire d'Amélioration des Productions Agricoles, Biotechnologie et Environnement (LAPABE), Faculté des Sciences, Université Mohammed Premier, Oujda 60000, Morocco; mohamedtaibi9@hotmail.fr (M.T.); amine.elbouzidi@ump.ac.ma (A.E.); tikent.aziz@ump.ac.ma (A.T.); b.elguerrouj@ump.ac.ma (B.E.G.); k.chaabane@ump.ac.ma (K.C.)

<sup>2</sup> Centre de l'Oriental des Sciences et Technologies de l'Eau et de l'Environnement (COSTEE), Université Mohammed Premier, Oujda 60000, Morocco; douaae.ouyahia@usmba.ac.ma

<sup>3</sup> Laboratory of Bioresources, Biotechnology, Ethnopharmacology and Health, Faculty of Sciences, Mohammed First University, Boulevard Mohamed VI, B.P. 717, Oujda 60000, Morocco; m.dalli@ump.ac.ma (M.D.); r.bellaouchi@ump.ac.ma (R.B.); mohammed.roubi1@ump.ac.ma (M.R.); ngseyra@hotmail.com (N.G.); asehraou@yahoo.fr (A.A.)

<sup>4</sup> Laboratory of Microbiology, Faculty of Medicine and Pharmacy, University Mohammed The First, Oujda 60000, Morocco

<sup>5</sup> Laboratoire de Biologie des Ligneux et des Grandes Cultures, INRAE USC1328, University of Orleans, CEDEX 2, 45067 Orléans, France

\* Correspondence: hano@univ-orleans.fr (C.H.); m.addi@ump.ac.ma (M.A.)

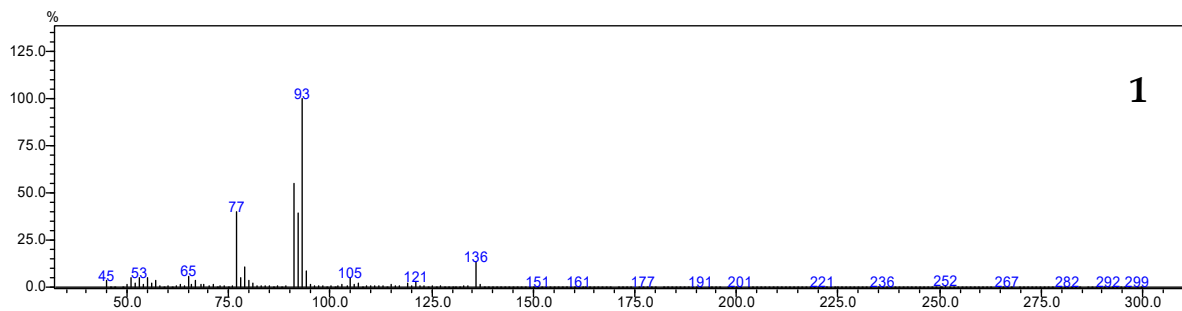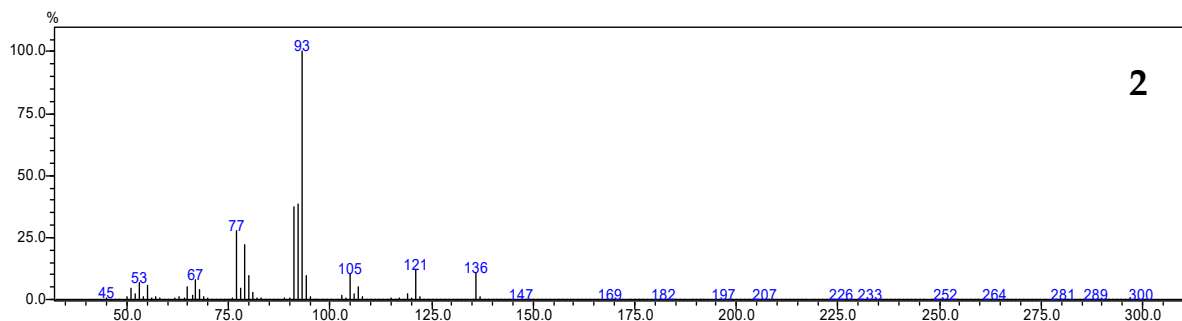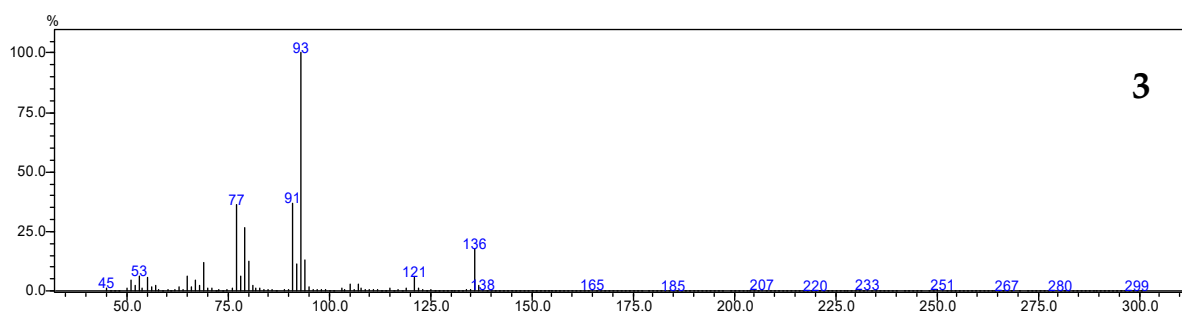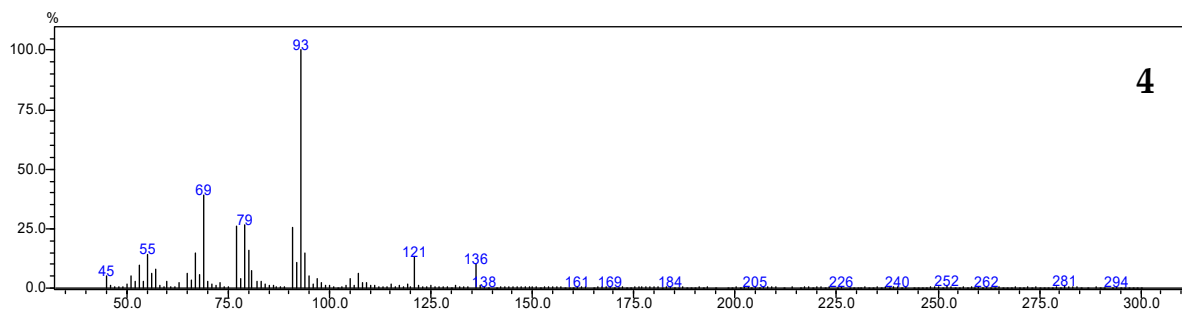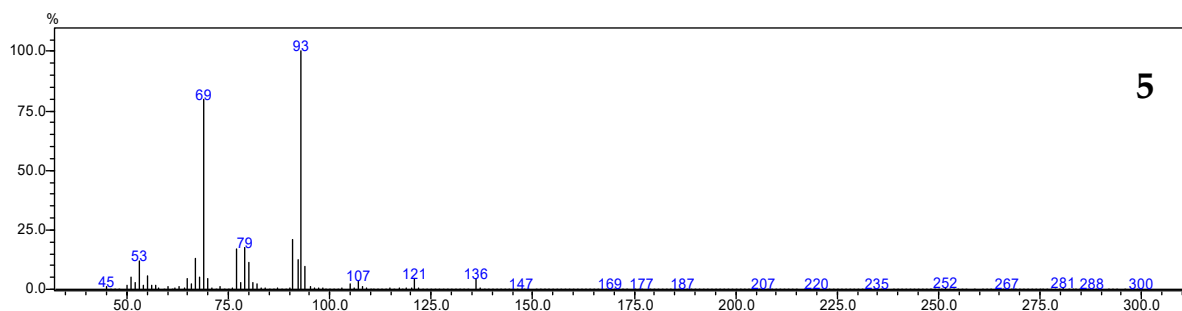

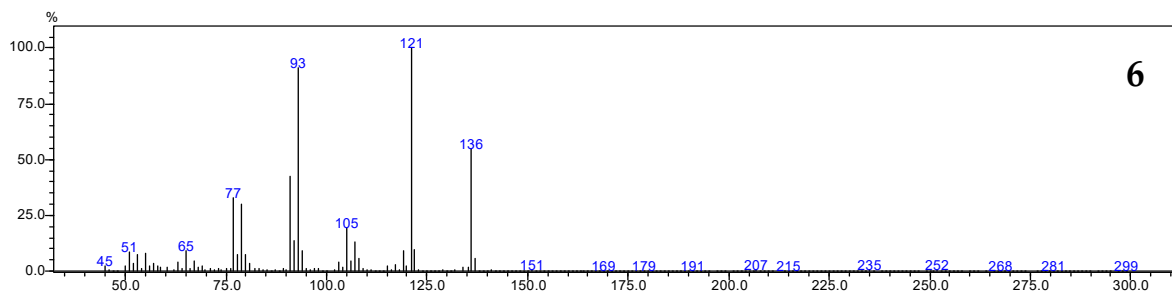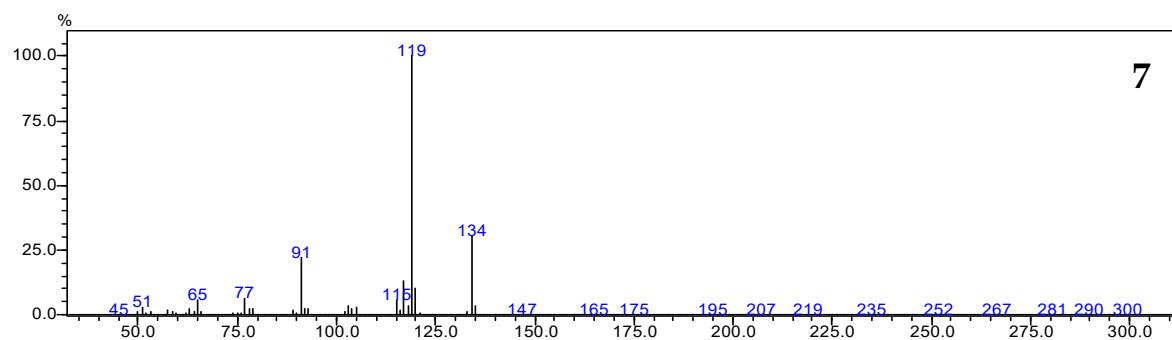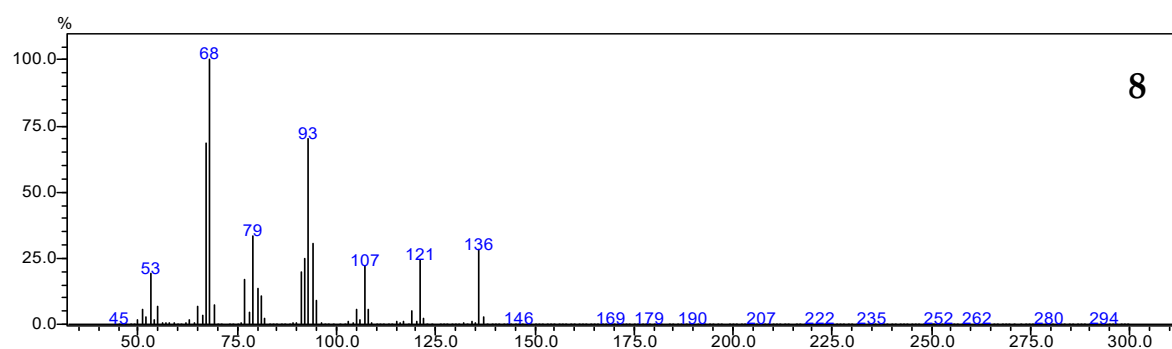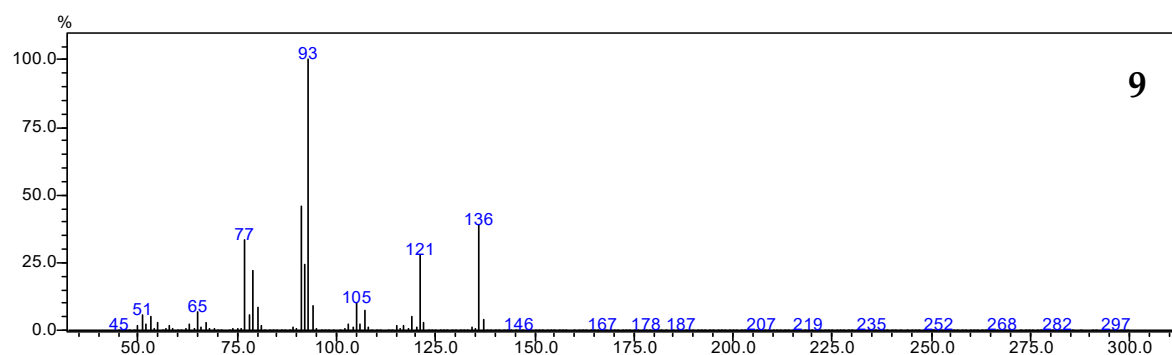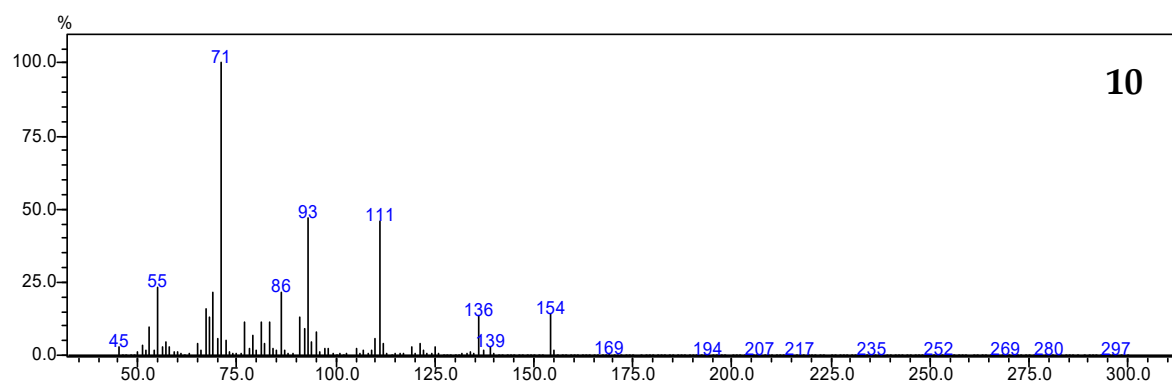

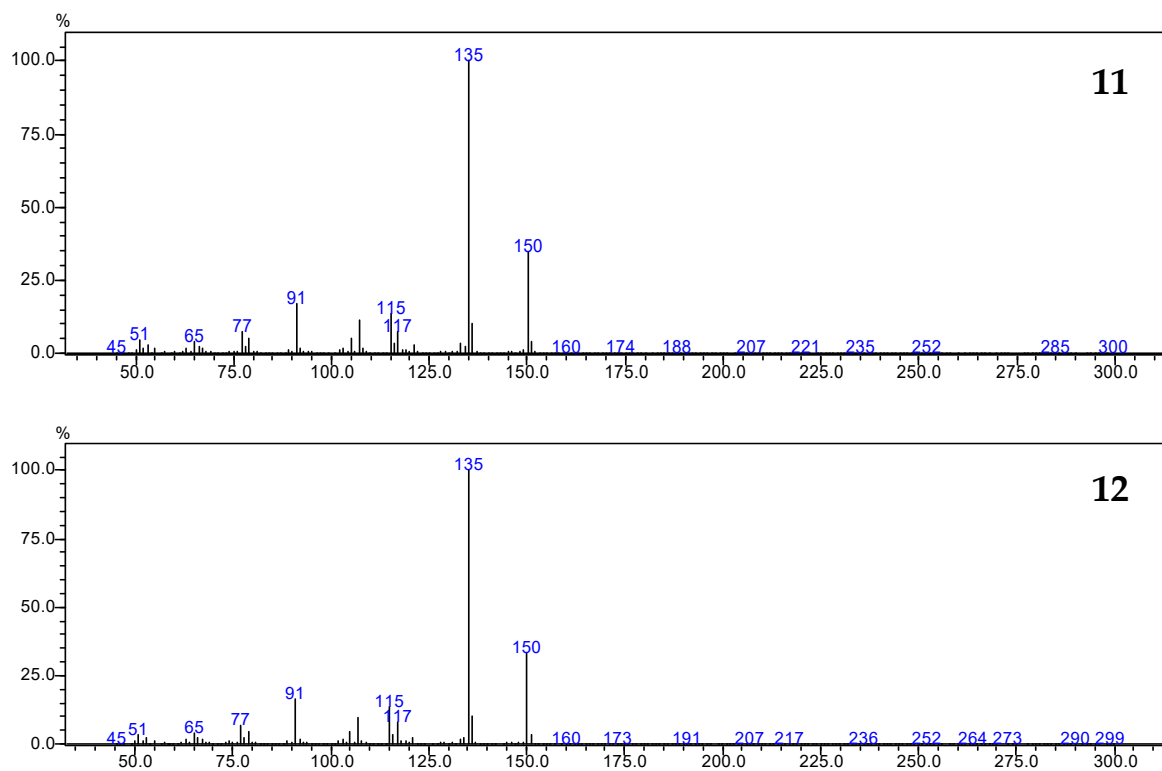

**Figure S1.** Copies of MS spectra of substances identified in PVEO using GC/MS. **(1)**  $\alpha$ -Thujene, **(2)**  $\alpha$ -Pinene, **(3)** Sabinene, **(4)**  $\beta$ -Pinene, **(5)**  $\beta$ -Myrcene, **(6)** (+)-4-Carene, **(7)** *m*-Cymene, **(8)** D-Limonene, **(9)**  $\gamma$ -Terpinene, **(10)** *p*-Menth-1-en-4-ol, **(11)** Thymol, **(12)** Carvacrol.

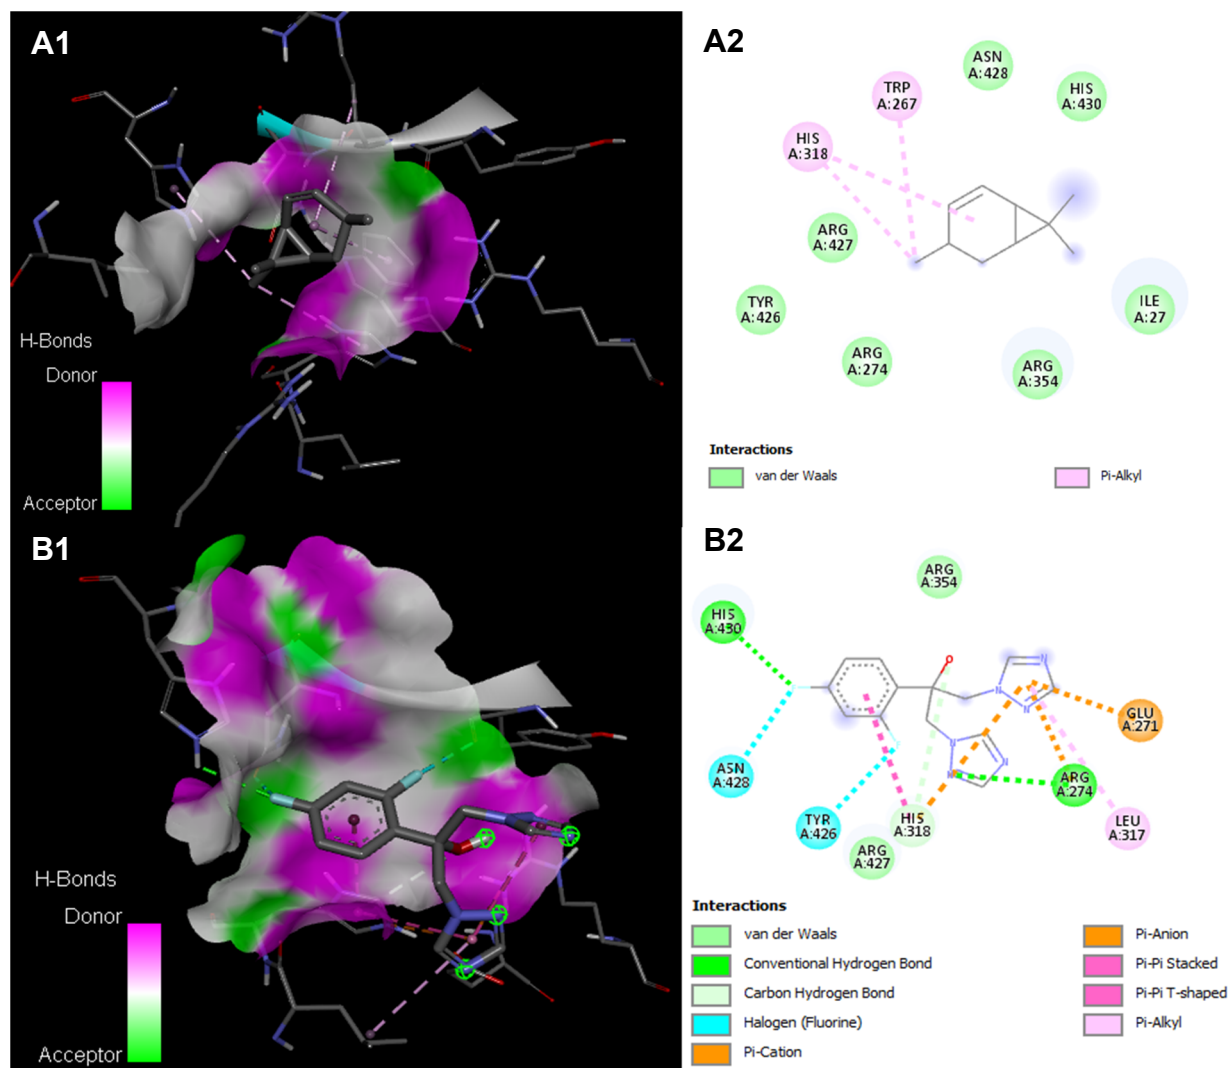

**Figure S2.** 2D, and 3D schemes of the interactions of 4-(+)-Carene (A1, and A2), the native ligand (Fluconazole) (B1, and B2), with the active site of Cytochrome P450 14  $\alpha$ -sterol Demethylase (PDB ID: 1EA1).

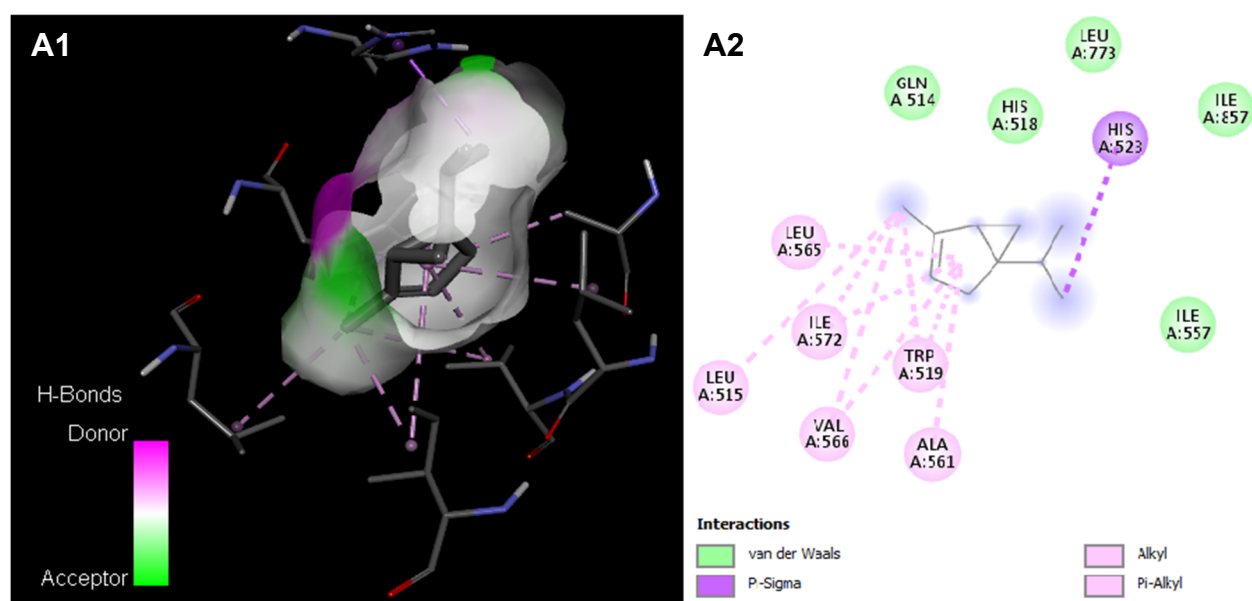

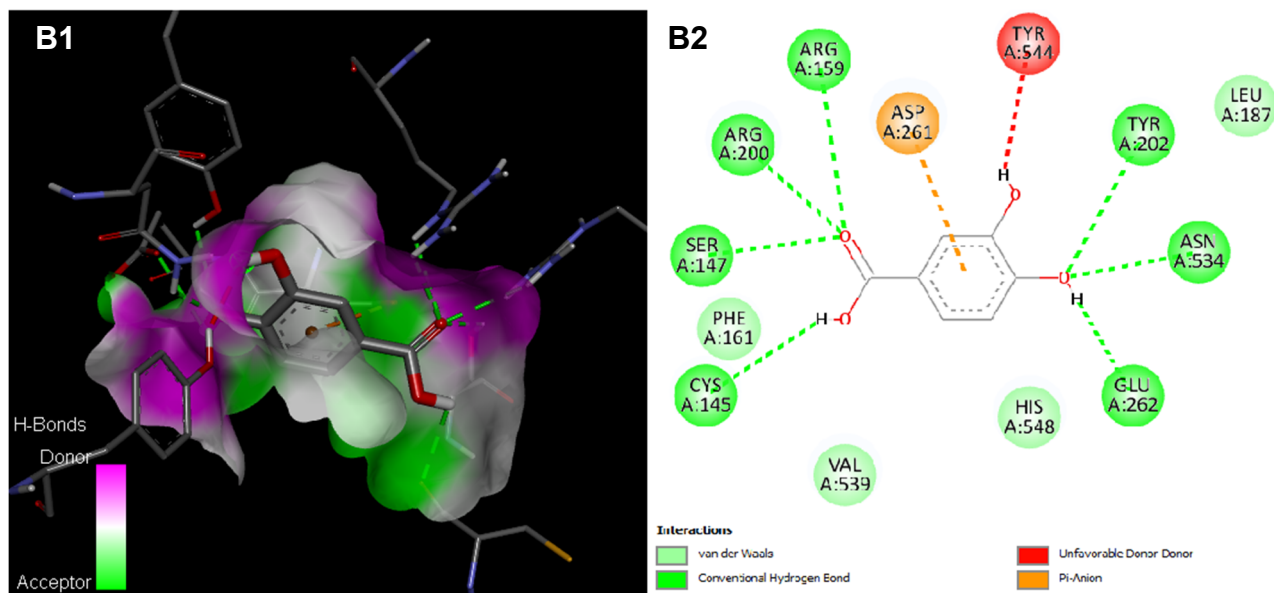

**Figure S3.** 2D, and 3D schemes of the interactions of  $\alpha$ -Thujene (A1, and A2), the native ligand (Protocatechuic Acid) (B1, and B2), with the active site of lipoxxygenase (PDB ID: 1N8Q)

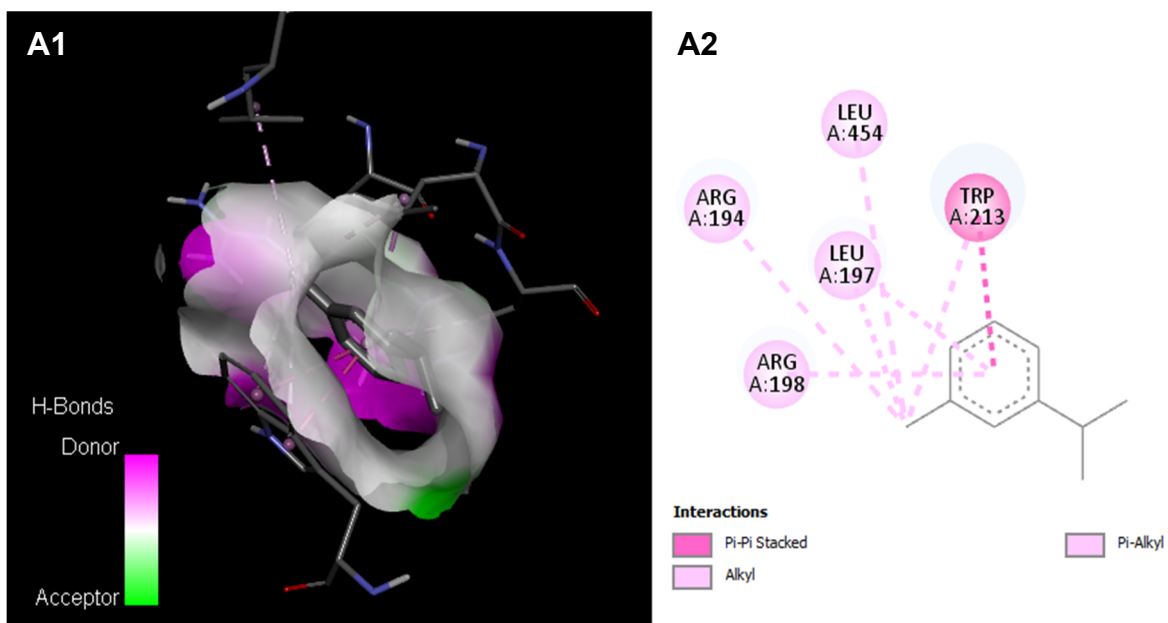

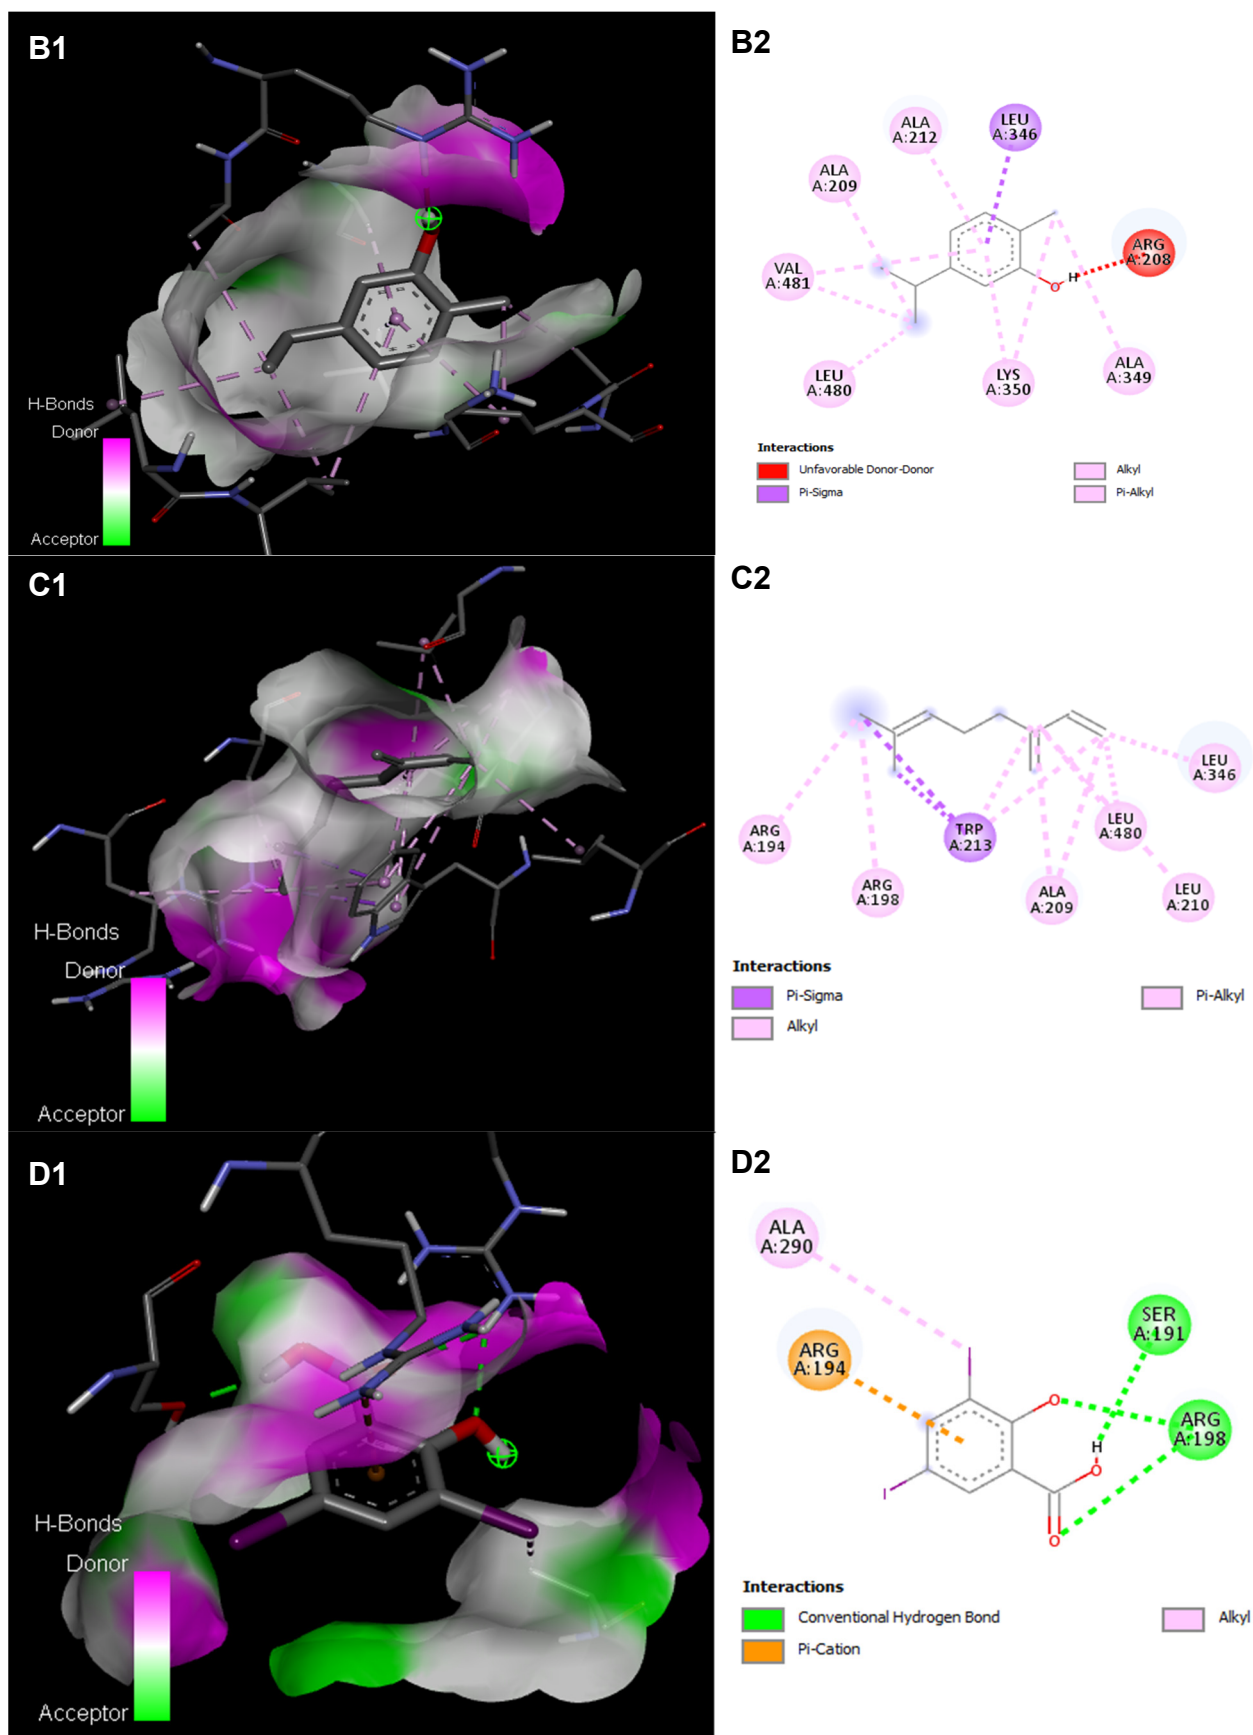

**Figure S4.** 2D, and 3D schemes of the interactions of *m*-Cymene (A1, and A2), Carvacrol (B1, and B2),  $\beta$ -Myrcene (C1, and C2), and the native ligand (3,5-Diiodosalicylic Acid) (D1, and D2), with the active site of bovine serum albumin (PDB ID: 4JK4)
